# Supplementary material for: Chiral nanostructures derived from europium(iii) complexes for enhanced circularly polarised luminescence and antibacterial activity
Source: Royal Society of Chemistry journal article supplement (doi:10.1039/d2tc02193e), 2022-01-01
Supplement: d2tc02193e1.pdf [file d2tc02193e1.pdf]

## ***SUPPORTING INFORMATION***

# **Chiral Nanostructures Derived from Europium (III) Complexes for Enhanced Circularly Polarised Luminescence and Antibacterial Activity**

Betsy Marydasan,<sup>a,b</sup> Karthika Suryaaletha,<sup>c</sup> Amrutha Manoj Lena,<sup>a</sup> Alida Sachin,<sup>a</sup> Tsuyoshi Kawai,<sup>d</sup> Sabu Thomas<sup>c</sup> and Jatish Kumar<sup>a\*</sup>

<sup>a</sup>*Department of Chemistry, Indian Institute of Science Education and Research (IISER) Tirupati, Tirupati 517507, India.*

<sup>b</sup>*Department of Chemistry, Government Arts College, Thiruvananthapuram, Kerala – 695014, India*

<sup>c</sup>*Cholera and Biofilm Research laboratory, Rajiv Gandhi Centre for Biotechnology (National Institute under the Dept. of Biotechnology, Govt. of India), Trivandrum, Kerala, India.*

<sup>d</sup>*Graduate School of Materials Science, Nara Institute of Science and Technology, Ikoma, Nara 630-0192, Japan.*

*Email: [jatish@iisertirupati.ac.in](mailto:jatish@iisertirupati.ac.in)*

| <b>Page No.</b> | <b>Contents</b>                                                                                  |
|-----------------|--------------------------------------------------------------------------------------------------|
| S3              | Fig. S1. Synthetic scheme for the preparation of the complexes                                   |
| S3              | Table S1: XRD data of the complex                                                                |
| S3              | Fig. S2. Single crystal XRD of Cs <sup>+</sup> [Eu((+)-tfac) <sub>4</sub> ] <sup>-</sup> complex |
| S4              | Fig. S3. CD, UV-vis, CPL and PL spectra of complexes in chloroform                               |
| S4              | Fig. S4. CD, UV-vis, CPL and PL spectra of Eu((+)-tfac) <sub>3</sub>                             |
| S5              | Fig. S5. Concentration dependent CPL spectra of Cs complex in chloroform                         |
| S5              | Table S2. g <sub>lum</sub> values of Cs complex in chloroform at different concentrations        |
| S5              | Fig. S6. Lifetime plots of complexes in chloroform                                               |
| S6              | Fig. S7. CD and UV-vis spectra of complexes in PMMA film                                         |
| S6              | Fig. S8. CD, UV-vis and lifetime plots of complexes in PMMA film                                 |

---

|     |                                                                                    |
|-----|------------------------------------------------------------------------------------|
| S7  | Fig. S9. Concentration dependent CPL spectra of Cs complex in PMMA films           |
| S7  | Table S3. $g_{lum}$ values of Cs complex in PMMA films at different concentrations |
| S8  | Fig. S10. CD spectra of the Cs derivative from different points on the film.       |
| S8  | Fig. S11. CPL spectra of the Cs derivative from different points on the film.      |
| S8  | Table S4. $g_{lum}$ values from different points on the PMMA films                 |
| S9  | Fig. S12. Photographic images of complexes under UV light                          |
| S9  | Fig. S13. SEM images of nanostructures formed in DMSO                              |
| S10 | Fig. S14. Concentration dependent CPL spectra of Cs complex in DMSO                |
| S10 | Table S5. $g_{lum}$ values of Cs complex in DMSO at different concentrations       |
| S11 | Fig. S15. CPL and PL spectra of the complexes in DMSO:water mixture                |
| S12 | Fig. S16. Percentage inhibition of $Rb^+[Eu(tfac)_4]^-$ against major pathogens.   |
| S12 | Fig. S17. Percentage inhibition of $K^+[Eu(tfac)_4]^-$ against major pathogens.    |

---

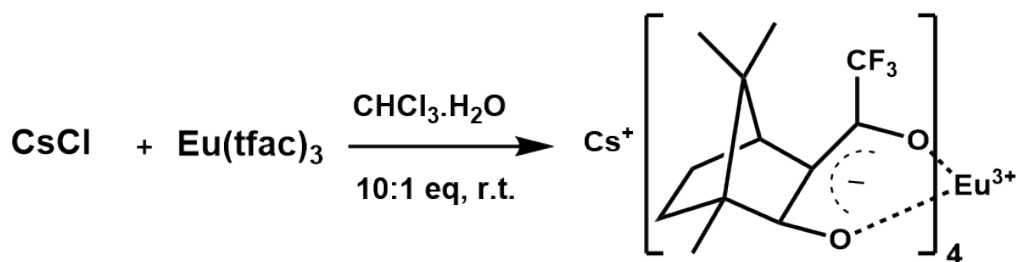

**Figure S1.** Synthetic scheme adopted the preparation of the Eu complex,  $\text{Cs}^+[\text{Eu}((+)\text{-tfac})_4]^-$ . Similar synthetic protocols were adopted for other complexes (Na, K and Rb) using the respective metal salts ( $\text{Na}_2\text{SO}_4$ , KCl and RbCl).

**Table S1.** Structural refinement and crystal data of  $\text{Cs}^+[\text{Eu}((+)\text{-tfac})_4]^-$

| Empirical formula | $\text{C}_{48}\text{H}_{56}\text{CsEuF}_{12}$ | $\mu$ (Mo $K\alpha$ )/ $\text{cm}^{-1}$ | 20.315 $\text{cm}^{-1}$ |
|-------------------|-----------------------------------------------|-----------------------------------------|-------------------------|
| Formula weight    | 1305.81                                       | measured reflections                    | 21982                   |
| Crystal system    | Tetragonal                                    | unique reflections                      | 2909                    |
| Space group       | I4 (#79)                                      | Reflection/Parameter Ratio              | 17.21                   |
| $a/\text{Å}$      | 17.4004(3)                                    | Residuals: R1                           | 0.0260                  |
| $c/\text{Å}$      | 8.41371(15)                                   | Residuals: Rw                           | 0.0727                  |
| Z                 | 2                                             | goodness of fitting                     | 1.191                   |
| $V/(\text{Å}^3)$  | 2547.45(8)                                    | T/K                                     | 123                     |

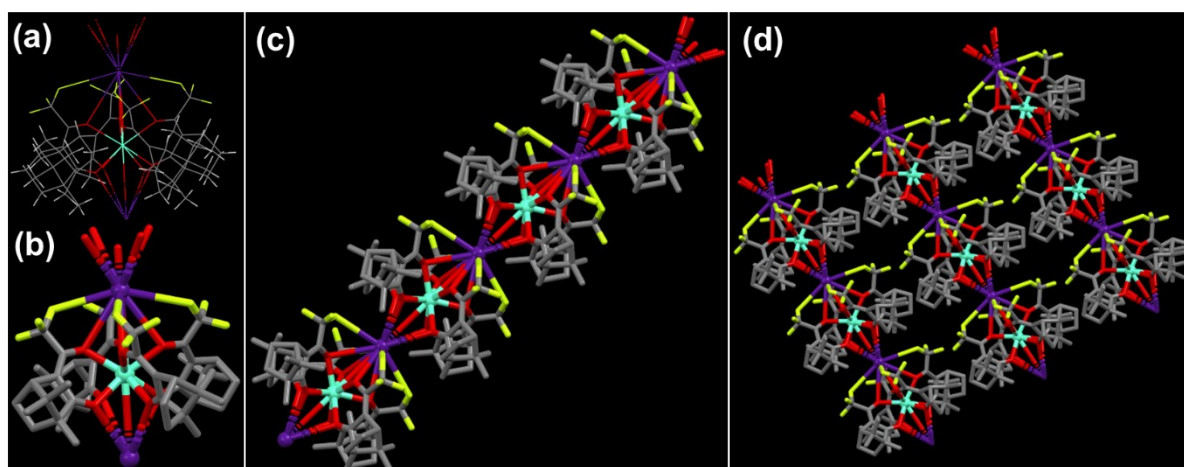

**Figure S2.** (a-c) X-ray crystal structure of (a,b)  $\text{Cs}^+[\text{Eu}((+)\text{-tfac})_4]^-$  complex, (c) its one-dimensional array and (d) the network structures.

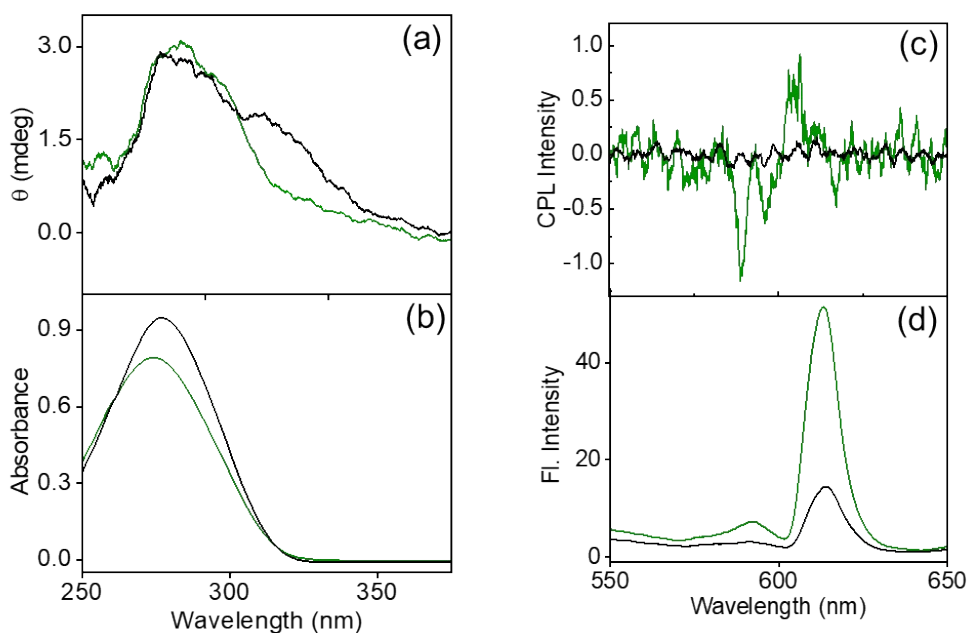

**Figure S3.** (a) CD, (b) absorption, (c) CPL and (d) luminescence spectra of  $\text{K}^+[\text{Eu}(\text{tfac})_4]^-$  (green traces) and  $\text{Na}^+[\text{Eu}(\text{tfac})_4]^-$  (black traces) in chloroform (concentration = 2.0 mM; excitation wavelength  $\lambda_{\text{ex}} = 317$  nm).

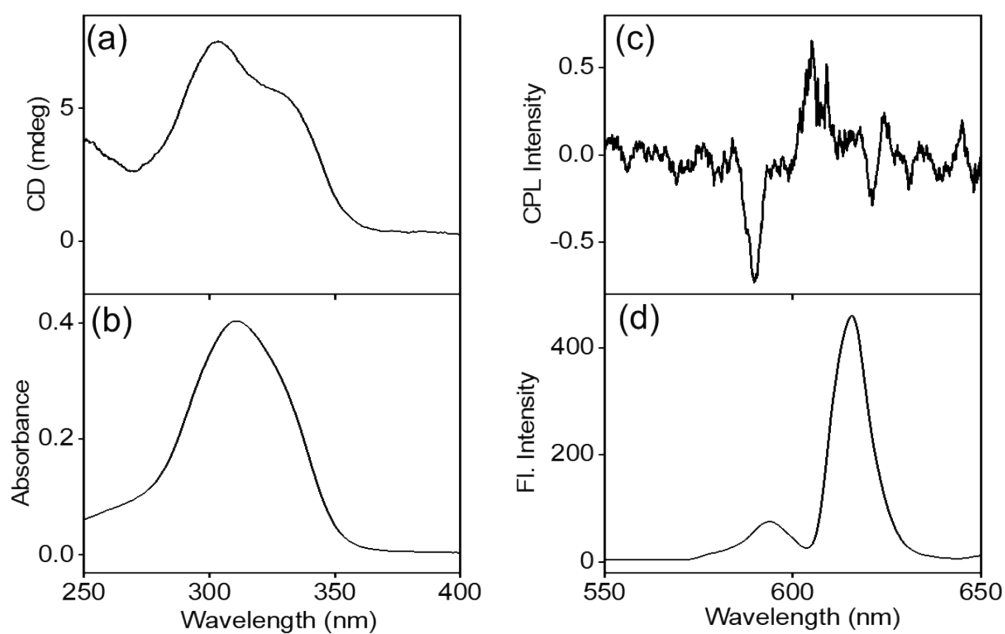

**Figure S4.** (a) CD, (b) absorption, (c) CPL and (d) luminescence spectra of  $\text{Eu}(++)\text{-tfac}_3$  in chloroform (concentration = 2.0 mM; excitation wavelength  $\lambda_{\text{ex}} = 352$  nm).

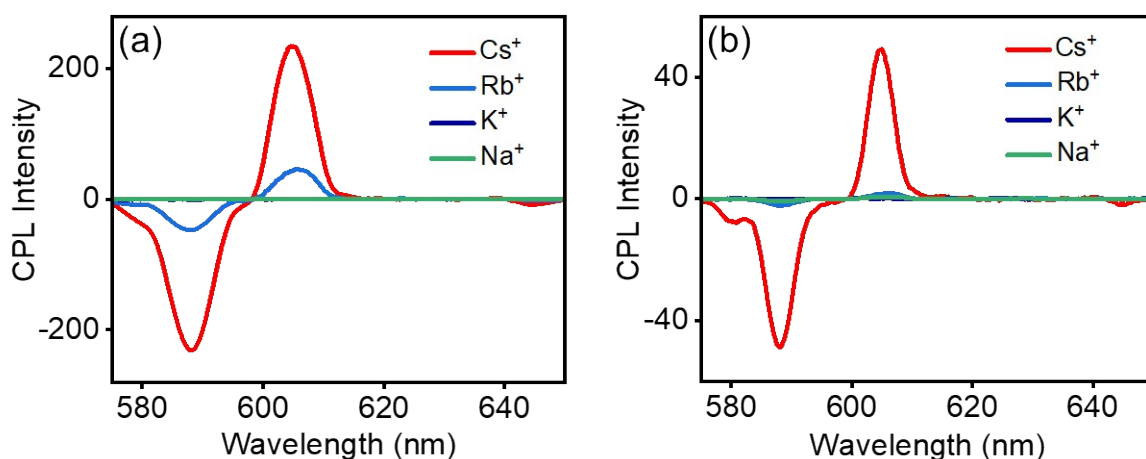

**Figure S5.** CPL spectra of (a) 2.0 mM and (b) 1.0 mM solution of the  $M^+[Eu(tfac)_4]^-$  complexes ( $M = Cs, Rb, K, Na$ ) in chloroform.

**Table S2.** The  $g_{lum}$  values of 2.0 mM and 1.0 mM solution the complexes in chloroform.

| Chloroform (2.0 mM) |                           |                           | Chloroform (1.0 mM) |                           |                           |
|---------------------|---------------------------|---------------------------|---------------------|---------------------------|---------------------------|
| M                   | $g_{lum} (^5D_0 - ^7F_1)$ | $g_{lum} (^5D_0 - ^7F_2)$ | M                   | $g_{lum} (^5D_0 - ^7F_1)$ | $g_{lum} (^5D_0 - ^7F_2)$ |
| Cs                  | -0.701                    | 0.128                     | Cs                  | -0.513                    | 0.046                     |
| Rb                  | -0.155                    | 0.051                     | Rb                  | -0.145                    | 0.047                     |
| K                   | -0.025                    | 0.003                     | K                   | -0.020                    | 0.025                     |
| Na                  | -0.005                    | 0.001                     | Na                  | -0.001                    | 0.002                     |

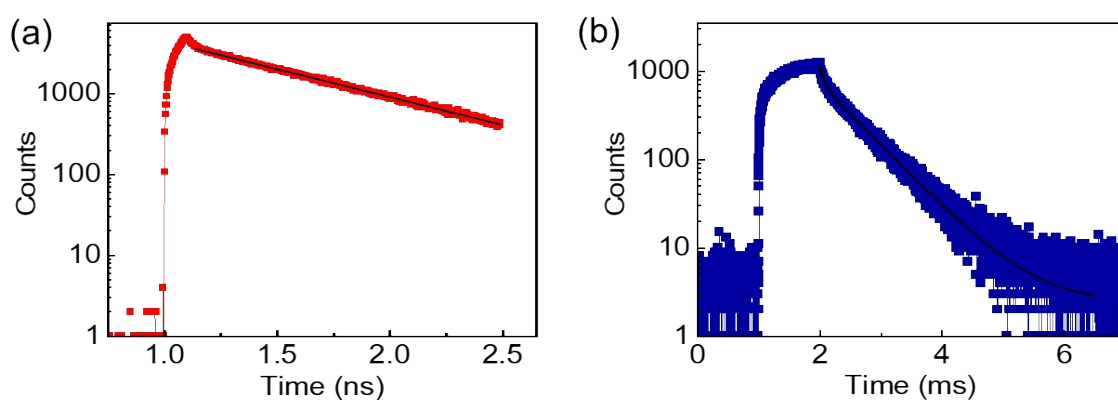

**Figure S6.** (a) Luminescence lifetime plots of (a)  $Cs^+[Eu((+)-tfac)_4]^-$  and (d)  $Rb^+[Eu((+)-tfac)_4]^-$  in chloroform.

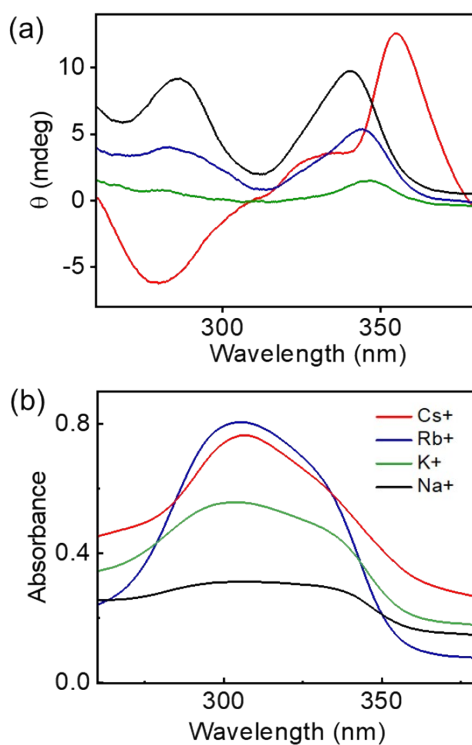

**Figure S7.** Solid state (a) CD and (b) absorption spectra of PMMA films of the  $M^+[Eu(tfac)_4]^-$  complexes.

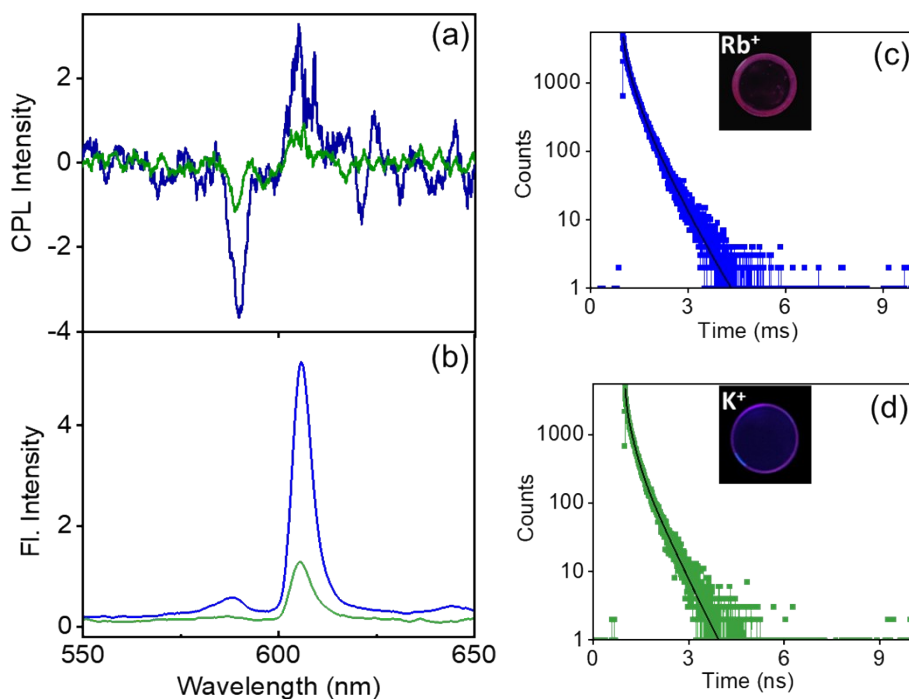

**Figure S8.** (a) CPL and (b) Fluorescence spectra of the  $Rb^+[Eu((+)-tfac)_4]^-$  (blue traces) and  $K^+[Eu((+)-tfac)_4]^-$  (green traces) embedded in the PMMA films. The luminescence lifetime plots of the PMMA films composed of (c)  $Rb^+[Eu((+)-tfac)_4]^-$  and (d)  $K^+[Eu((+)-tfac)_4]^-$ .

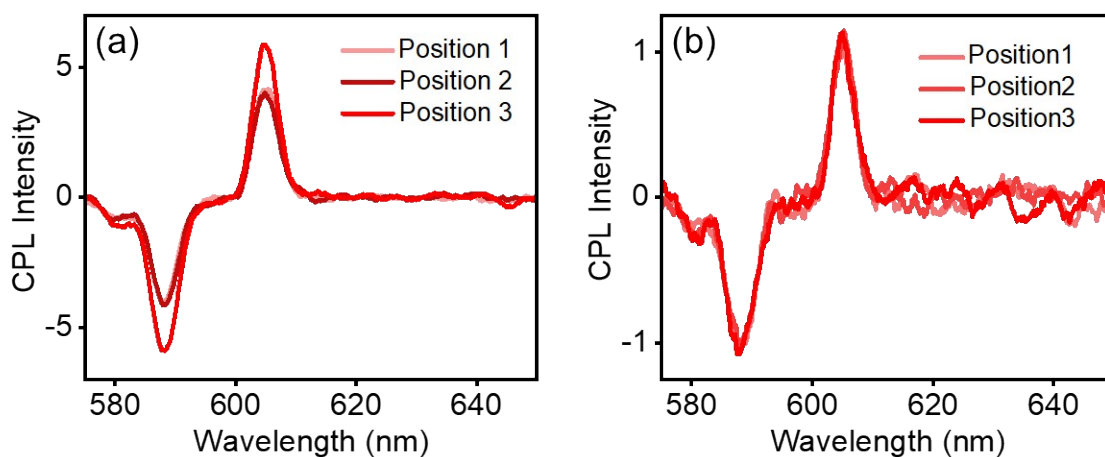

**Figure S9.** CPL spectra of  $\text{Cs}^+[\text{Eu}((+)\text{-tfac})_4]^-$  collected from different points on the PMMA film prepared using a (a) 2.0 mM and (b) 1.0 mM solution of the complex in chloroform. Position 3 refers to the spectra collected after flipping the film.

**Table S3.** The  $g_{\text{lum}}$  values collected from different points on the PMMA films of  $\text{Cs}^+[\text{Eu}(\text{tfac})_4]^-$  complexes prepared using 2.0 mM and 1.0 mM solution in chloroform.

|            | PMMA (2.0 mM)        |                      | PMMA (1.0 mM)        |                      |
|------------|----------------------|----------------------|----------------------|----------------------|
|            | $g_{\text{lum}@595}$ | $g_{\text{lum}@610}$ | $g_{\text{lum}@595}$ | $g_{\text{lum}@610}$ |
| Position 1 | -0.290               | 0.031                | -0.071               | 0.007                |
| Position 2 | -0.289               | 0.029                | -0.070               | 0.007                |
| Position 3 | -0.280               | 0.028                | -0.072               | 0.007                |

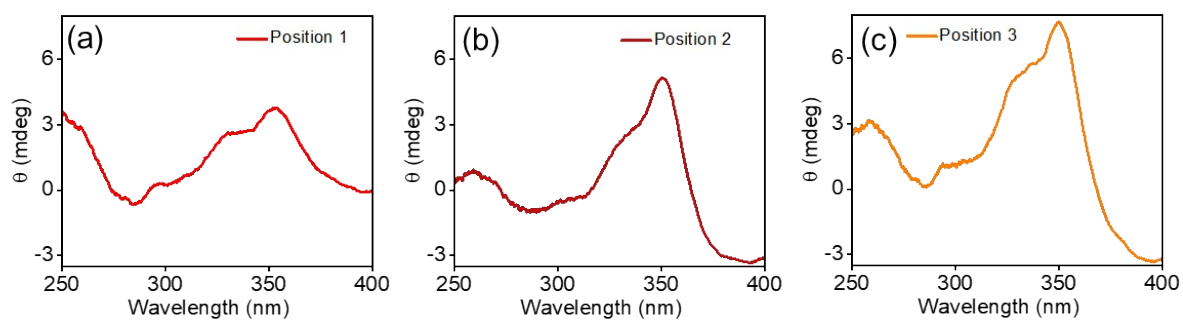

**Figure S10.** CD spectra of  $\text{Cs}^+[\text{Eu}((+)\text{-tfac})_4]^-$  collected from different points after rotation and flipping of the PMMA film. Position 3 refers to spectra collected after flipping the film.

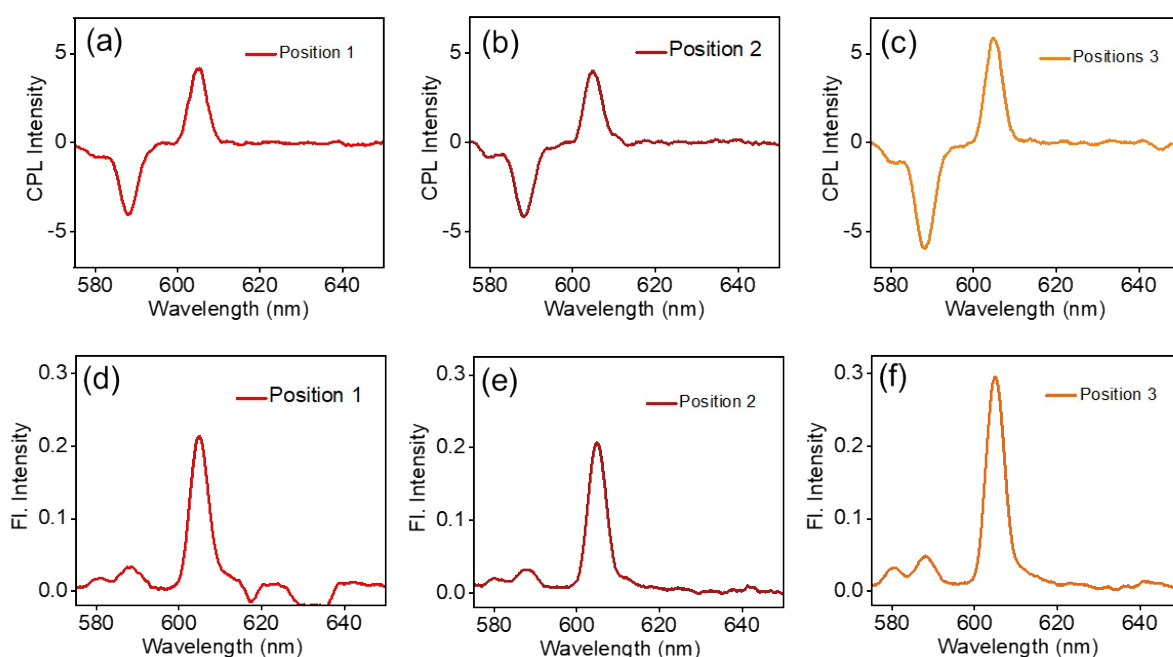

**Figure S11.** (a-c) CPL and (d-f) luminescence spectra of  $\text{Cs}^+[\text{Eu}((+)\text{-tfac})_4]^-$  collected from different points after rotation and flipping of the PMMA film. Position 3 refers to the spectra collected after flipping the film.

**Table S4.** Chiral anisotropy values of  $\text{Cs}^+[\text{Eu}((+)\text{-tfac})_4]^-$  PMMA film collected from different points on the film.

|            | $g_{\text{lum}@595}$ | $g_{\text{lum}@610}$ |
|------------|----------------------|----------------------|
| Position 1 | -0.290               | 0.031                |
| Position 2 | -0.289               | 0.029                |
| Position 3 | -0.280               | 0.028                |



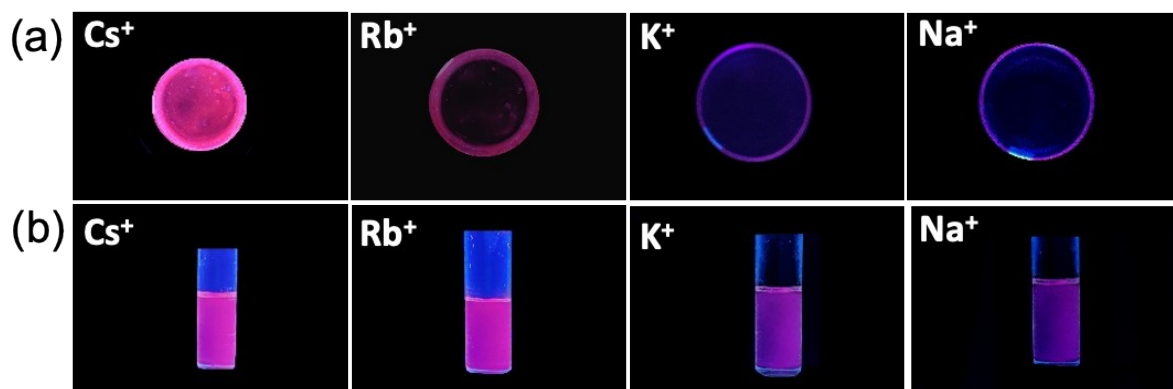

**Figure S12.** Photographic images of (a) solid films and (b) solution samples of  $M^+[Eu((+)-tfac)_4]^-$  ( $M = Cs, Rb, K, Na$ ) complexes in DMSO taken under 365 nm UV light.

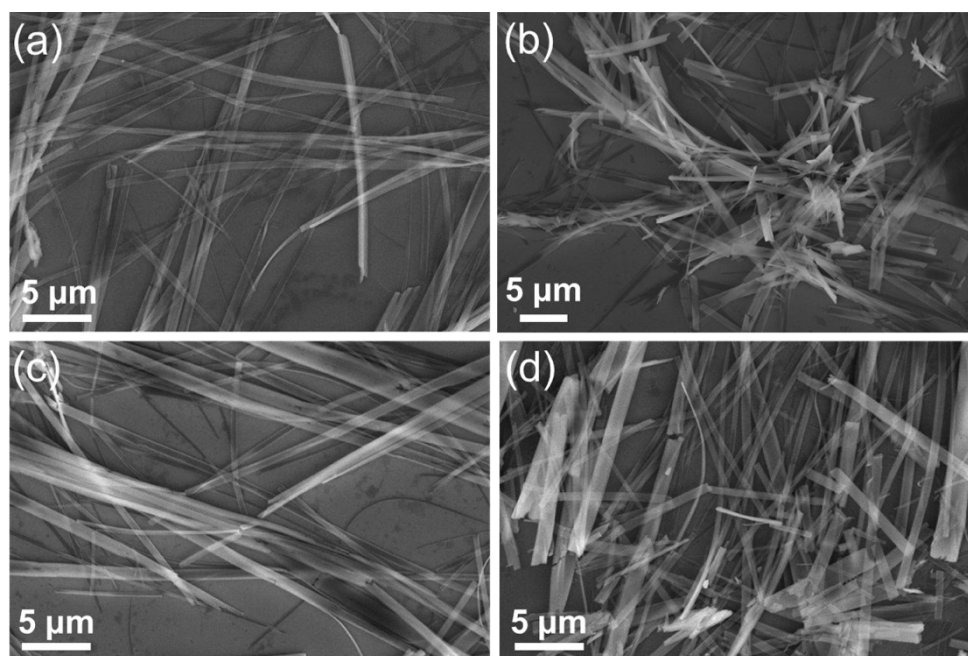

**Figure S13.** SEM images of nanostructures formed in DMSO solutions of (a)  $Cs^+[Eu((+)-tfac)_4]^-$ , (b)  $Rb^+[Eu((+)-tfac)_4]^-$ ,  $K^+[Eu((+)-tfac)_4]^-$  and  $Na^+[Eu((+)-tfac)_4]^-$ .

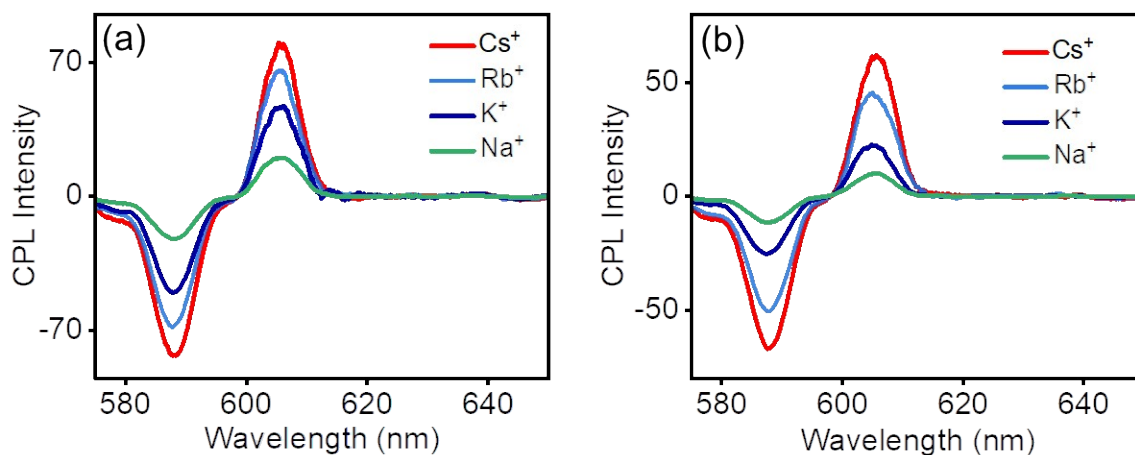

**Figure S14.** CPL spectra of (a) 2.0 mM and (b) 1.0 mM solution of the  $M^+[Eu(tfac)_4]^-$  complexes ( $M = Cs, Rb, K, Na$ ) in DMSO.

**Table S5.** The  $g_{lum}$  values of 2.0 mM and 1.0 mM solution the complexes in DMSO.

| DMSO (2.0 mM) |                           |                           | DMSO (1.0 mM) |                           |                           |
|---------------|---------------------------|---------------------------|---------------|---------------------------|---------------------------|
| M             | $g_{lum} (^5D_0 - ^7F_1)$ | $g_{lum} (^5D_0 - ^7F_2)$ | M             | $g_{lum} (^5D_0 - ^7F_1)$ | $g_{lum} (^5D_0 - ^7F_2)$ |
| Cs            | -0.691                    | 0.133                     | Cs            | -0.518                    | -0.054                    |
| Rb            | -0.565                    | 0.054                     | Rb            | -0.483                    | -0.047                    |
| K             | -0.492                    | 0.047                     | K             | -0.465                    | -0.042                    |
| Na            | -0.440                    | 0.041                     | Na            | -0.256                    | -0.024                    |

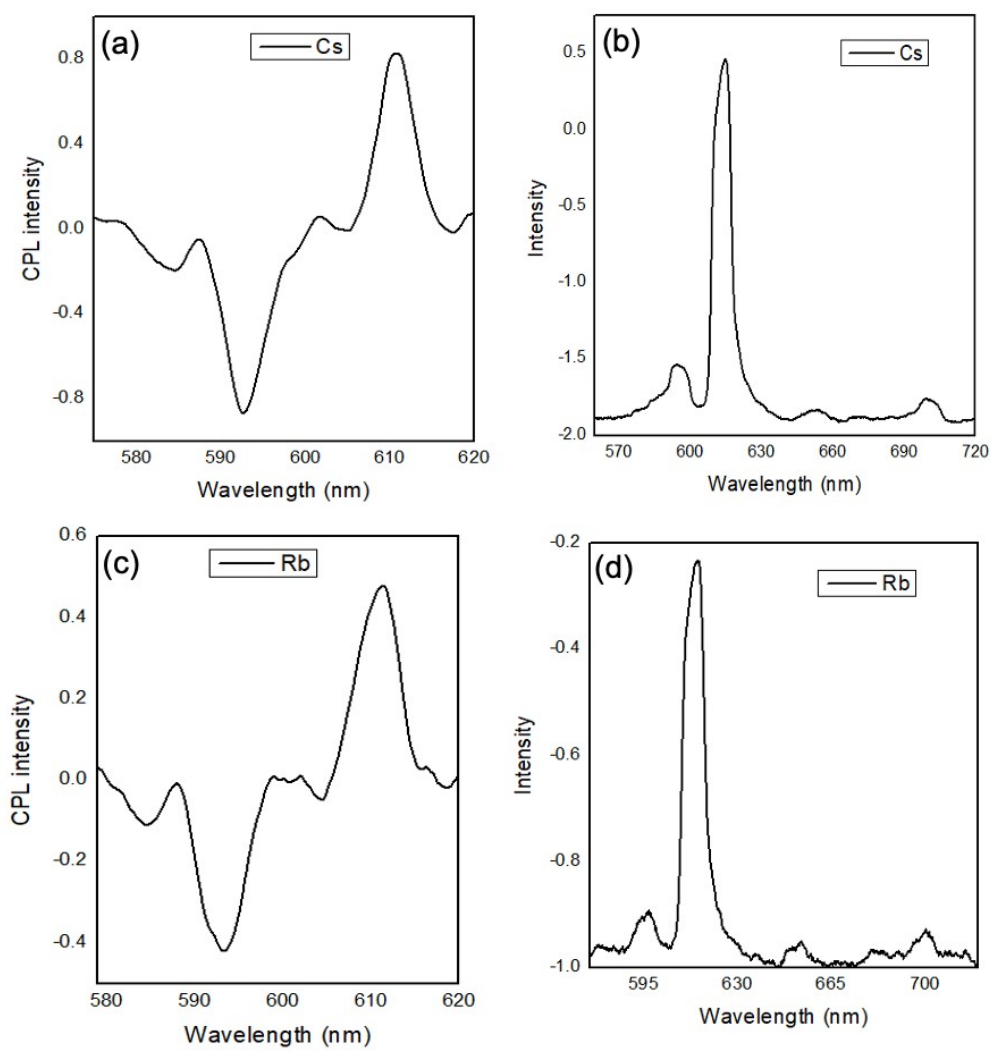

**Figure S15.** (a,c) CPL and (b,d) fluorescence spectra of (a,b) Cs<sup>+</sup>[Eu((+)-tfac)<sub>4</sub>]<sup>-</sup> and (c,d) Rb<sup>+</sup>[Eu((+)-tfac)<sub>4</sub>]<sup>-</sup> collected in DMSO:water (1:4) mixture.

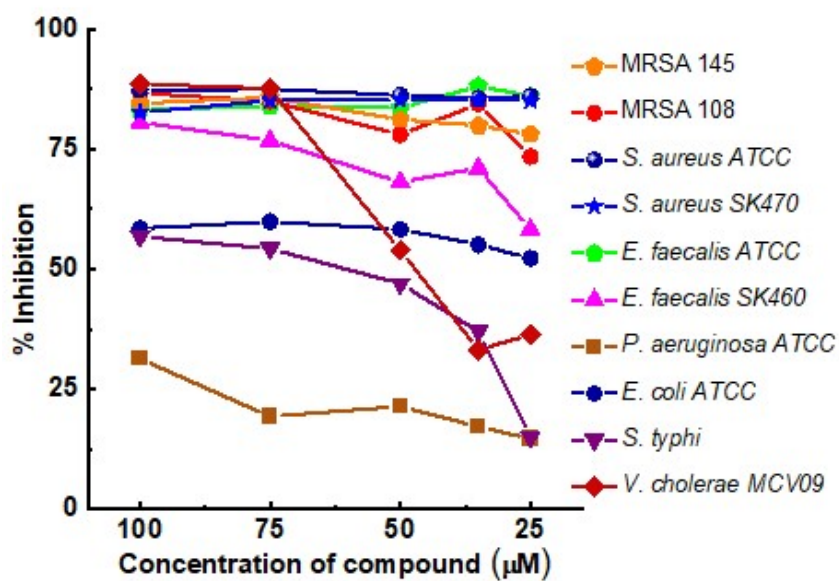

**Figure S16.** Percentage inhibition of  $\text{Rb}^+[\text{Eu}((+)\text{-tfac})_4]^-$  compound against major Gram positive and Gram-negative pathogens.

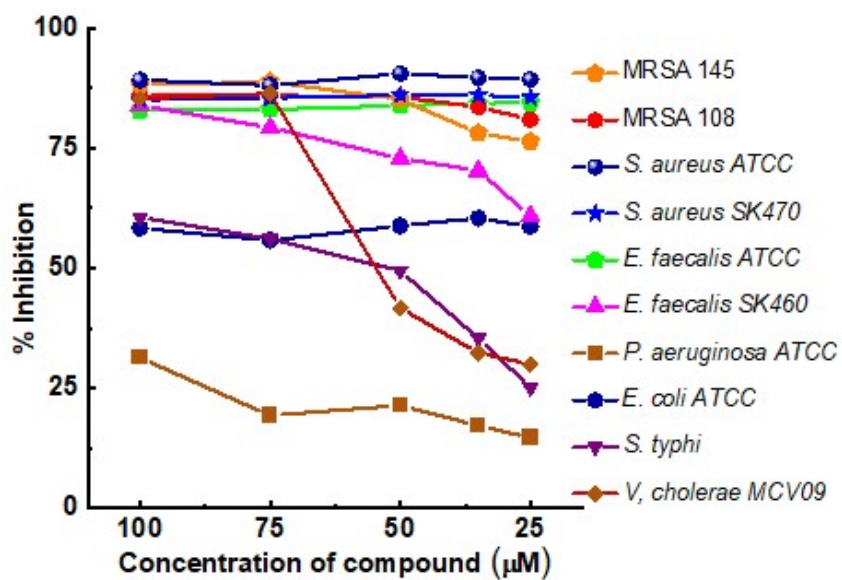

**Figure S17.** Percentage inhibition of  $\text{K}^+[\text{Eu}((+)\text{-tfac})_4]^-$  compound against major Gram positive and Gram-negative pathogens.
